# Supplementary material for: A carbon nanofibers–Sm2O3 nanocomposite: a novel electrochemical platform for simultaneously detecting two isomers of dihydroxybenzene
Source: Royal Society of Chemistry journal article supplement (doi:10.1039/c7ay02981k), 2018-01-01
Supplement: c7ay02981k1.pdf [file c7ay02981k1.pdf]

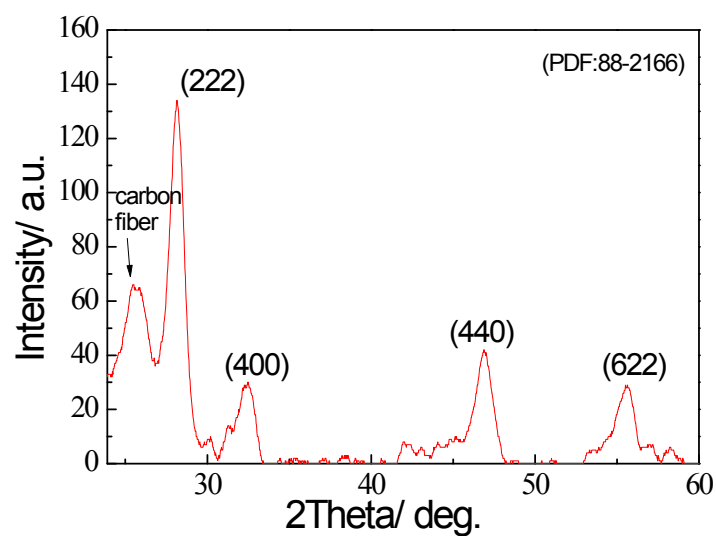

Fig. S1. XRD pattern of CNFs-Sm<sub>2</sub>O<sub>3</sub> achieved via the calcination process.

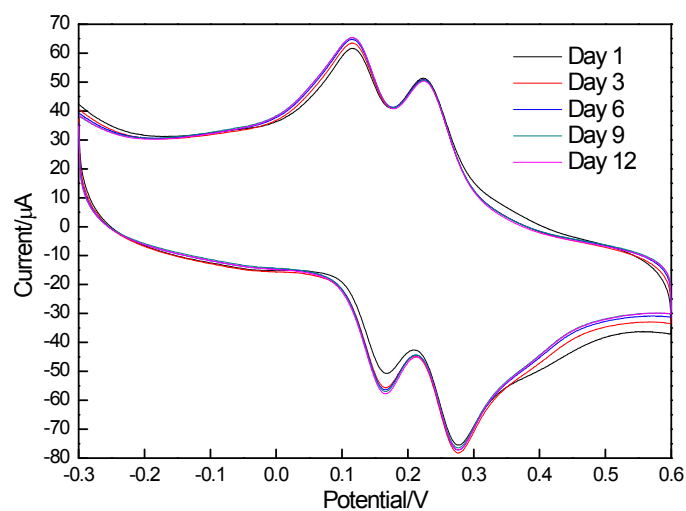

Fig. S2. CV curves of different electrodes made in different days for simultaneous determination of 200  $\mu$ M HQ and CC in 0.2 M PBS solution (pH = 5.5). The scanning rate is set as 100 mV/s.

Table S1. The response current of different electrodes made in different days in mixture solution of 200  $\mu$ M HQ and CC in 0.2 M PBS buffer (pH = 5.5).

| Fabrication day    | HQ(Ipa)/ $\mu$ A | HQ(Ipc) / $\mu$ A | CC(Ipa) / $\mu$ A | CC(Ipc) / $\mu$ A |
|--------------------|------------------|-------------------|-------------------|-------------------|
| Day 1              | -50.635          | 61.651            | -75.436           | 51.307            |
| Day 3              | -55.676          | 63.464            | -78.201           | 50.772            |
| Day 6              | -56.387          | 64.803            | -77.215           | 50.895            |
| Day 9              | -57.026          | 65.322            | -76.453           | 50.525            |
| Day 12             | -57.807          | 65.453            | -77.120           | 50.287            |
| Standard deviation | 2.834            | 1.597             | 1.022             | 0.386             |
